# Supplementary material
Source: Springer Nature journal article supplement (https://www.springermedizin.de/resource/supplementary/13099_2010_41_MOESM5_ESM.pdf/9665386)

# Dendrogram D

Similarity

*Sma*I

*Kpn*I

Serotypes

ERY

NAL

CIP

AZM

AMP

CL

CM

KM

NM

GM

SM

CF

TE

SXT

SU

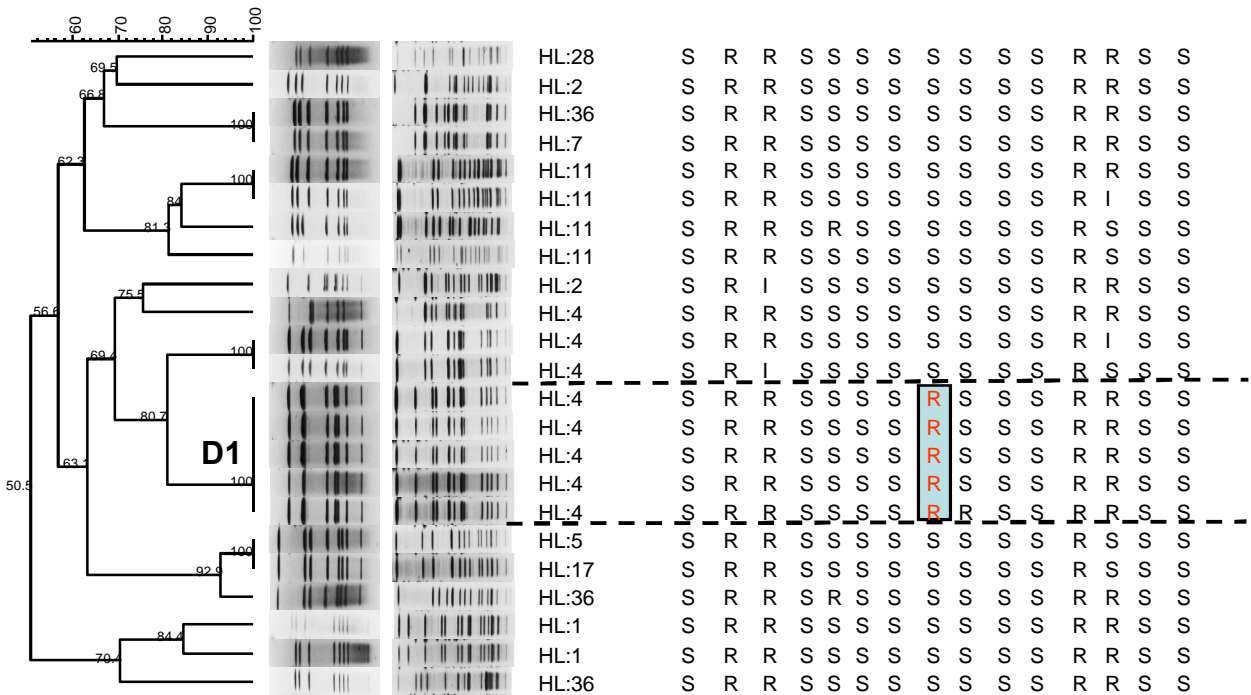

Supplement: MOESM5 [file 9665386]
